# Supplementary material for: Functional analysis of CgWRKY57 from Cymbidium goeringii in ABA response
Source: PeerJ. 2021 Feb 23;9:e10982. doi: 10.7717/peerj.10982 (PMC7908890; doi:10.7717/peerj.10982)
Supplement: Supplemental Information 1 [file peerj-09-10982-s002.xlsx]

## Sheet: Sheet1
		Germination rate
	0uM ABA			1uM ABA			2uM ABA
WT	98			68			40
57-1	96			52			40
57-2	96			44			24
57-3	92			38			28
