# Supplementary material for: Functional analysis of CgWRKY57 from Cymbidium goeringii in ABA response
Source: PeerJ. 2021 Feb 23;9:e10982. doi: 10.7717/peerj.10982 (PMC7908890; doi:10.7717/peerj.10982)
Supplement: Supplemental Information 2 [file peerj-09-10982-s003.xlsx]

## Sheet: Sheet1
different tissues
Target Name	Sample Name	CT	18S	ΔCт
57	S1	24.11	21.5594	2.55066
57	S2	24.2162	21.5594	2.65677
57	S3	24.5584	21.5594	2.99903
57	P1	23.0667	17.0556	6.01117
57	P2	22.7732	17.0556	5.71761
57	P3	22.8672	17.0556	5.81162
57	L1	25.7101	18.5076	7.20249
57	L2	25.5238	18.5076	7.01625
57	L3	25.6468	18.5076	7.13925
57	F1	28.1898	19.9154	8.27436
57	F2	27.9324	19.9154	8.01697
57	F3	27.7346	19.9154	7.81915
water treatment
Sample Name	Cт	18S	ΔCт	ΔCт 0
57-0	26.8106	19.7852	7.02545	7.02545
57-0	26.8106	19.7852	7.02545	7.02545
57-0	26.8106	19.7852	7.02545	7.02545
57-2	27.5121	20.1084	7.4037	7.02545
57-2	27.4164	20.1084	7.30807	7.02545
57-2	27.5277	20.1084	7.41934	7.02545
57-6	27.7571	22.8403	4.91677	7.02545
57-6	27.8286	22.8403	4.98826	7.02545
57-6	27.8766	22.8403	5.03625	7.02545
57-12	25.1737	20.393	4.78061	7.02545
57-12	25.0334	20.393	4.6404	7.02545
57-12	25.4544	20.393	5.06138	7.02545
57-24	26.6873	19.4166	7.27073	7.02545
57-24	26.8979	19.4166	7.48132	7.02545
57-24	27.1659	19.4166	7.74934	7.02545
57-48	26.1791	17.551	8.62809	7.02545
57-48	25.6485	17.551	8.09756	7.02545
57-48	25.9189	17.551	8.36786	7.02545
ABA treatment
Sample Name	Cт	18S	ΔCт	ΔCт0
57-0	24.9149	20.2586	4.65635	4.65635
57-0	24.9149	20.2586	4.65635	4.65635
57-0	24.9149	20.2586	4.65635	4.65635
57-2	25.0625	20.0398	5.02264	4.65635
57-2	25.5092	20.0398	5.46937	4.65635
57-2	25.3639	20.0398	5.32408	4.65635
57-6	25.9154	20.3648	5.55054	4.65635
57-6	25.8605	20.3648	5.49565	4.65635
57-6	26.0908	20.3648	5.72594	4.65635
57-12	24.1675	19.6787	4.48878	4.65635
57-12	24.087	19.6787	4.40823	4.65635
57-12	23.9727	19.6787	4.29396	4.65635
57-24	26.8938	20.324	6.56977	4.65635
57-24	26.7971	20.324	6.47312	4.65635
57-24	26.5368	20.324	6.21287	4.65635
57-48	30.4132	21.6795	8.73368	4.65635
57-48	30.2571	21.6795	8.5776	4.65635
57-48	29.9157	21.6795	8.23617	4.65635
42℃ treatment
Sample Name	Cт	18S	ΔCт	ΔCт 0
57-0	25.6109	20.1575	5.45341	5.45341
57-0	25.6109	20.1575	5.45341	5.45341
57-0	25.6109	20.1575	5.45341	5.45341
57-2	28.3882	23.3204	5.06787	5.45341
57-2	28.688	23.3204	5.36766	5.45341
57-2	28.2534	23.3204	4.93302	5.45341
57-6	27.4891	21.6733	5.81581	5.45341
57-6	27.36	21.6733	5.68671	5.45341
57-6	27.6994	21.6733	6.02606	5.45341
57-12	29.6439	21.1115	8.53247	5.45341
57-12	29.228	21.1115	8.11651	5.45341
57-12	29.8387	21.1115	8.72722	5.45341
57-24	29.2736	22.0656	7.20802	5.45341
57-24	29.0032	22.0656	6.93762	5.45341
57-24	29.2735	22.0656	7.2079	5.45341
57-48	29.4896	22.63	6.85956	5.45341
57-48	29.4272	22.63	6.79711	5.45341
57-48	29.3454	22.63	6.71538	5.45341
4℃ treatment
57-0	25.8948	20.1513	5.74352	5.74352
57-0	25.8948	20.1513	5.74352	5.74352
57-0	25.8948	20.1513	5.74352	5.74352
57-2	25.8094	21.6618	4.14761	5.74352
57-2	25.9103	21.6618	4.24847	5.74352
57-2	25.7939	21.6618	4.13211	5.74352
57-6	26.6994	21.5703	5.12905	5.74352
57-6	26.5537	21.5703	4.9834	5.74352
57-6	26.8079	21.5703	5.23757	5.74352
57-12	25.6321	21.3733	4.25879	5.74352
57-12	25.7162	21.3733	4.34286	5.74352
57-12	25.5023	21.3733	4.12901	5.74352
57-24	26.2691	21.8969	4.37219	5.74352
57-24	26.2748	21.8969	4.37787	5.74352
57-24	26.0155	21.8969	4.1186	5.74352
57-48	28.0312	22.6026	5.42863	5.74352
57-48	28.7859	22.6026	6.1833	5.74352
57-48	27.6768	22.6026	5.07422	5.74352
