# Supplementary material for: Functional analysis of CgWRKY57 from Cymbidium goeringii in ABA response
Source: PeerJ. 2021 Feb 23;9:e10982. doi: 10.7717/peerj.10982 (PMC7908890; doi:10.7717/peerj.10982)
Supplement: Supplemental Information 3 [file peerj-09-10982-s004.xlsx]

## Sheet: Sheet1
	Root length
	WT	57-1	57-2	57-3
0uM	4.3	3.8	3.7	3.8
2uM	3.2	2	2.1	2.1
